# Supplementary material
Source: Copernicus journal article supplement (doi:10.5194/egusphere-2026-2574)
Supplement: Supplementary file 1 [file egusphere-2026-2574-supplement.pdf]

| Set ID | Expansion Name             | Release Date | Total Number of Cards | Number of Mineral-Related Cards |
|--------|----------------------------|--------------|-----------------------|---------------------------------|
| 1      | Base Set                   | 1999/1/8     | 102                   |                                 |
| 2      | Jungle                     | 1999/6/15    | 64                    |                                 |
| 3      | Wizards Black Star Promos  | 1999/6/30    | 54                    |                                 |
| 4      | Fossil                     | 1999/10/9    | 62                    |                                 |
| 5      | Base Set 2                 | 2000/2/23    | 130                   |                                 |
| 6      | Team Rocket                | 2000/4/23    | 83                    | 1                               |
| 7      | Gym Heroes                 | 2000/8/13    | 132                   |                                 |
| 8      | Gym Challenge              | 2000/10/15   | 132                   |                                 |
| 9      | Neo Genesis                | 2000/12/15   | 111                   |                                 |
| 10     | Neo Discovery              | 2001/5/31    | 75                    |                                 |
| 11     | Southern Islands           | 2001/7/30    | 18                    |                                 |
| 12     | Neo Revelation             | 2001/9/20    | 66                    |                                 |
| 13     | Neo Destiny                | 2002/2/27    | 113                   |                                 |
| 14     | Legendary Collection       | 2002/5/23    | 110                   |                                 |
| 15     | Expedition Base Set        | 2002/9/14    | 165                   |                                 |
| 16     | Aquapolis                  | 2003/1/14    | 150                   |                                 |
| 17     | Skyridge                   | 2003/5/11    | 150                   | 4                               |
| 18     | EX Ruby & Sapphire         | 2003/6/30    | 109                   | 1                               |
| 19     | EX Sandstorm               | 2003/9/17    | 100                   |                                 |
| 20     | Nintendo Black Star Promos | 2003/9/30    | 40                    |                                 |
| 21     | EX Dragon                  | 2003/11/24   | 100                   | 1                               |
| 22     | EX Team Magma vs Team Aqua | 2004/2/29    | 97                    |                                 |
| 23     | EX Hidden Legends          | 2004/5/31    | 102                   |                                 |
| 24     | EX FireRed & LeafGreen     | 2004/8/31    | 116                   |                                 |
| 25     | EX Team Rocket Returns     | 2004/10/31   | 111                   | 2                               |
| 26     | EX Deoxys                  | 2005/1/31    | 108                   | 1                               |
| 27     | EX Emerald                 | 2005/4/30    | 106                   |                                 |
| 28     | EX Unseen Forces           | 2005/7/31    | 134                   | 1                               |
| 29     | EX Delta Species           | 2005/10/30   | 114                   |                                 |
| 30     | EX Legend Maker            | 2006/1/31    | 93                    |                                 |
| 31     | EX Holon Phantoms          | 2006/4/30    | 111                   | 2                               |
| 32     | EX Crystal Guardians       | 2006/7/31    | 100                   | 37                              |
| 33     | EX Dragon Frontiers        | 2006/10/31   | 101                   | 2                               |
| 34     | EX Power Keepers           | 2007/2/1     | 102                   |                                 |
| 35     | DP Black Star Promos       | 2007/4/30    | 56                    |                                 |
| 36     | Diamond & Pearl            | 2007/4/30    | 130                   |                                 |
| 37     | Mysterious Treasures       | 2007/7/31    | 124                   |                                 |
| 38     | Secret Wonders             | 2007/10/31   | 132                   | 2                               |
| 39     | Great Encounters           | 2008/1/31    | 106                   |                                 |
| 40     | Majestic Dawn              | 2008/4/30    | 100                   |                                 |
| 41     | Legends Awakened           | 2008/7/31    | 146                   |                                 |
| 42     | Stormfront                 | 2008/10/31   | 106                   |                                 |
| 43     | Platinum                   | 2009/2/10    | 133                   |                                 |

|    |                        |            |     |    |
|----|------------------------|------------|-----|----|
| 44 | Rising Rivals          | 2009/5/15  | 118 |    |
| 45 | Supreme Victors        | 2009/8/18  | 142 |    |
| 46 | Arceus                 | 2009/11/3  | 111 |    |
| 47 | Pokémon Rumble         | 2009/12/1  | 16  |    |
| 48 | HGSS Black Star Promos | 2010/2/9   | 25  |    |
| 49 | HeartGold & SoulSilver | 2010/2/9   | 124 |    |
| 50 | HS-Unleashed           | 2010/5/11  | 96  |    |
| 51 | HS-Undaunted           | 2010/8/17  | 91  |    |
| 52 | HS-Triumphant          | 2010/11/2  | 103 | 3  |
| 53 | Call of Legends        | 2011/2/8   | 106 |    |
| 54 | BW Black Star Promos   | 2011/2/28  | 101 | 1  |
| 55 | Black & White          | 2011/4/24  | 115 |    |
| 56 | Emerging Powers        | 2011/8/30  | 98  |    |
| 57 | Noble Victories        | 2011/11/15 | 102 |    |
| 58 | Next Destinies         | 2012/2/7   | 103 |    |
| 59 | Dark Explorers         | 2012/5/8   | 111 | 7  |
| 60 | Dragons Exalted        | 2012/8/14  | 118 |    |
| 61 | Dragon Vault           | 2012/10/4  | 21  |    |
| 62 | Boundaries Crossed     | 2012/11/6  | 153 |    |
| 63 | Plasma Storm           | 2013/2/5   | 138 | 1  |
| 64 | Plasma Freeze          | 2013/5/7   | 118 | 32 |
| 65 | Plasma Blast           | 2013/8/13  | 105 | 12 |
| 66 | Legendary Treasures    | 2013/11/5  | 140 | 2  |
| 67 | XY Black Star Promos   | 2013/10/11 | 211 | 1  |
| 68 | Kalos Starter Set      | 2013/11/7  | 39  |    |
| 69 | XY                     | 2014/2/4   | 146 |    |
| 70 | Flashfire              | 2014/5/6   | 109 |    |
| 71 | Furious Fists          | 2014/8/12  | 113 | 1  |
| 72 | Phantom Forces         | 2014/11/4  | 122 | 2  |
| 73 | Primal Clash           | 2015/2/3   | 164 | 1  |
| 74 | Double Crisis          | 2015/3/24  | 34  |    |
| 75 | Roaring Skies          | 2015/5/5   | 110 | 1  |
| 76 | Ancient Origins        | 2015/8/11  | 100 | 1  |
| 77 | BREAKthrough           | 2015/11/3  | 164 |    |
| 78 | BREAKpoint             | 2016/2/2   | 123 |    |
| 79 | Generations            | 2016/2/21  | 115 |    |
| 80 | Fates Collide          | 2016/5/1   | 125 | 2  |
| 81 | Steam Siege            | 2016/8/2   | 116 |    |
| 82 | Evolutions             | 2016/11/1  | 113 |    |
| 83 | SM Black Star Promos   | 2017/2/2   | 248 |    |
| 84 | Sun & Moon             | 2017/2/2   | 172 |    |
| 85 | Guardians Rising       | 2017/5/4   | 169 | 1  |
| 86 | Burning Shadows        | 2017/8/4   | 169 | 3  |
| 87 | Shining Legends        | 2017/10/5  | 78  | 1  |
| 88 | Crimson Invasion       | 2017/11/2  | 124 |    |
| 89 | Ultra Prism            | 2018/2/1   | 173 |    |

|       |                                   |            |     |   |
|-------|-----------------------------------|------------|-----|---|
| 90    | Forbidden Light                   | 2018/5/3   | 146 | 1 |
| 91    | Celestial Storm                   | 2018/8/2   | 183 | 1 |
| 92    | Dragon Majesty                    | 2018/9/6   | 78  | 1 |
| 93    | Lost Thunder                      | 2018/11/1  | 236 | 1 |
| 94    | Team Up                           | 2019/1/31  | 196 |   |
| 95    | Detective Pikachu                 | 2019/4/5   | 18  |   |
| 96    | Unbroken Bonds                    | 2019/5/2   | 234 | 3 |
| 97    | Unified Minds                     | 2019/8/1   | 258 | 4 |
| 98    | Hidden Fates                      | 2019/8/22  | 163 |   |
| 99    | Cosmic Eclipse                    | 2019/10/31 | 271 | 3 |
| <hr/> |                                   |            |     |   |
| 100   | SWSH Black Star Promos            | 2019/11/14 | 307 | 3 |
| 101   | Sword & Shield                    | 2020/2/6   | 216 | 1 |
| 102   | Rebel Clash                       | 2020/4/30  | 209 | 2 |
| 103   | Darkness Ablaze                   | 2000/8/13  | 201 | 2 |
| 104   | Champion's Path                   | 2020/9/24  | 80  |   |
| 105   | Vivid Voltage                     | 2020/11/12 | 203 | 1 |
| 106   | McDonald's 25th Anniversary       | 2021/2/9   | 25  |   |
| 107   | Shining Fates                     | 2021/2/19  | 195 |   |
| 108   | Battle Styles                     | 2021/3/19  | 183 |   |
| 109   | Chilling Reign                    | 2021/6/18  | 233 |   |
| 110   | Evolving Skies                    | 2021/8/27  | 237 | 4 |
| 111   | Celebrations                      | 2021/10/8  | 25  |   |
| 112   | Celebrations - Classic Collection | 2021/10/8  | 25  |   |
| 113   | Fusion Strike                     | 2021/11/12 | 284 | 1 |
| 114   | Brilliant Stars                   | 2022/2/25  | 216 |   |
| 115   | Astral Radiance                   | 2022/5/27  | 246 | 3 |
| 116   | Pokemon Go                        | 2022/7/1   | 88  |   |
| 117   | McDonald's 2022                   | 2022/8/3   | 15  |   |
| 118   | Trick or Trade                    | 2022/9/1   | 30  |   |
| 119   | Lost Origin                       | 2022/9/9   | 247 | 2 |
| 120   | Silver Tempest                    | 2022/11/11 | 245 | 3 |
| 121   | Crown Zenith                      | 2023/1/20  | 230 | 2 |
| <hr/> |                                   |            |     |   |
| 122   | SV Black Star Promos              | 2023/1/6   | 215 |   |
| 123   | Scarlet & Violet                  | 2023/3/31  | 258 |   |
| 124   | Paldea Evolved                    | 2023/6/9   | 279 | 6 |
| 125   | Obsidian Flames                   | 2023/8/11  | 230 | 1 |
| 126   | McDonald's 2023                   | 2023/8/23  | 15  |   |
| 127   | Trick or Trade 2023               | 2023/9/1   | 30  |   |
| 128   | Pokemon 151                       | 2023/9/22  | 207 | 1 |
| 129   | Paradox Rift                      | 2023/11/3  | 266 | 4 |
| 130   | Paldean Fates                     | 2024/1/26  | 245 |   |
| 131   | Temporal Forces                   | 2024/3/22  | 218 | 2 |
| 132   | Twilight Masquerade               | 2024/5/24  | 226 | 2 |
| 133   | Shrouded Fable                    | 2024/8/2   | 99  | 1 |
| 134   | Trick or Trade 2024               | 2024/9/6   | 30  |   |
| 135   | Stellar Crown                     | 2024/9/13  | 175 | 4 |

|       |                                  |            |       |     |
|-------|----------------------------------|------------|-------|-----|
| 136   | Surging Sparks                   | 2024/11/8  | 252   | 2   |
| 137   | Prismatic Evolutions             | 2025/1/17  | 180   | 1   |
| 138   | McDonald's 2025                  | 2025/1/21  | 15    |     |
| 139   | Journey Together                 | 2025/3/28  | 190   | 4   |
| 140   | Destined Rivals                  | 2025/5/30  | 244   | 4   |
| 141   | White Flare                      | 2025/7/18  | 173   | 2   |
| 142   | Black Bolt                       | 2025/7/18  | 172   | 1   |
| <hr/> |                                  |            |       |     |
| 143   | Mega Evolution Black Star Promos | 2025/9/26  | 10    |     |
| 144   | Mega Evolution                   | 2025/9/26  | 188   |     |
| 145   | Phantasmal Flames                | 2025/11/14 | 130   | 1   |
| 146   | Ascended Heroes                  | 2026/1/30  | 295   | 2   |
| 147   | Perfect Order                    | 2026/3/27  | 124   |     |
| <hr/> |                                  |            |       |     |
|       | Total                            |            | 19875 | 202 |
